# Supplementary material for: Bimetallic Ni–Mo nitride@N-doped C as highly active and stable bifunctional electrocatalysts for full water splitting
Source: Royal Society of Chemistry journal article supplement (doi:10.1039/d2nj01303g), 2022-01-01
Supplement: d2nj01303g1.pdf [file d2nj01303g1.pdf]

# Electronic Supplementary Information for

## Bimetallic Ni-Mo nitride@N-doped C as highly active and stable bifunctional electrocatalysts for full water splitting

Yu Zhang, <sup>a</sup> Zhuoxun Yin, <sup>\*a</sup> Xinzhi Ma, <sup>\*b</sup> Yang Zhou <sup>\*c</sup>

*a College of Chemistry and Chemical Engineering, Qiqihar University, Qiqihar  
161006, China. E-mail: [yzx@qqhru.edu.cn](mailto:yzx@qqhru.edu.cn);*

*b Ministry of Education and School of Physics and Electronic Engineering, Harbin  
Normal University, Harbin 150025, China. E-mail: [maxz0224@126.com](mailto:maxz0224@126.com);*

*c College of Science, Qiqihar University, Qiqihar 161006, China. E-mail:  
[373133430@qq.com](mailto:373133430@qq.com);*

*\* Corresponding author.*

*E-mail addresses: [yzx@qqhru.edu.cn](mailto:yzx@qqhru.edu.cn)*

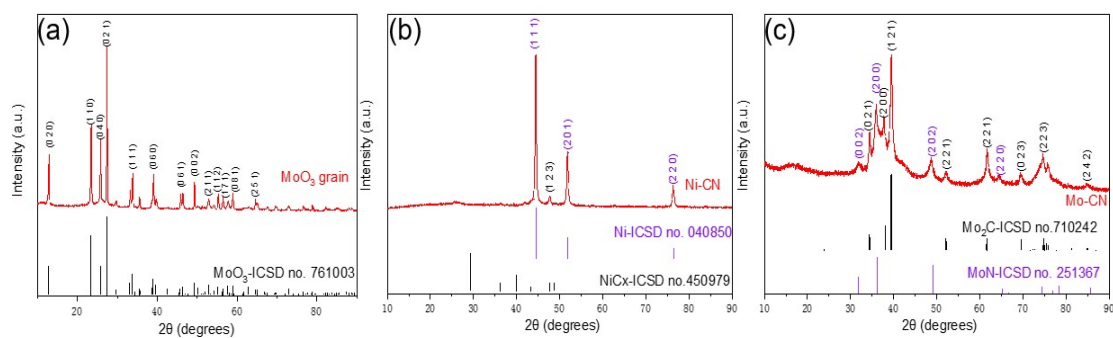

**Figure S1** XRD pattern of (a) MoO<sub>3</sub> grain (b) Ni-CN (c) Mo-CN.

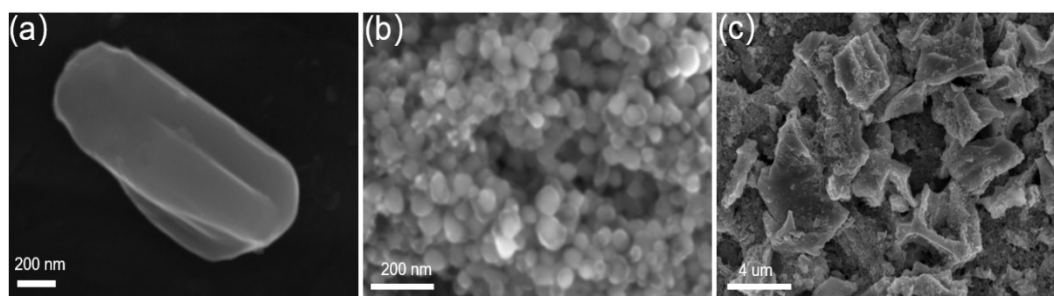

**Figure S2** SEM images of (a) MoO<sub>3</sub> grain (b) Ni-CN (c) Mo-CN.

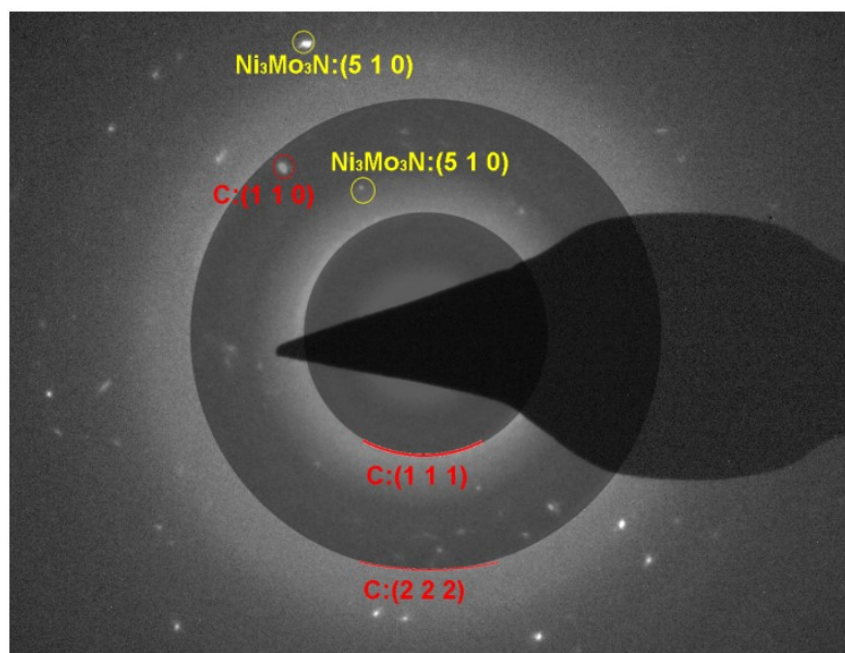

**Figure S3** SAED pattern of NiMoN -2.

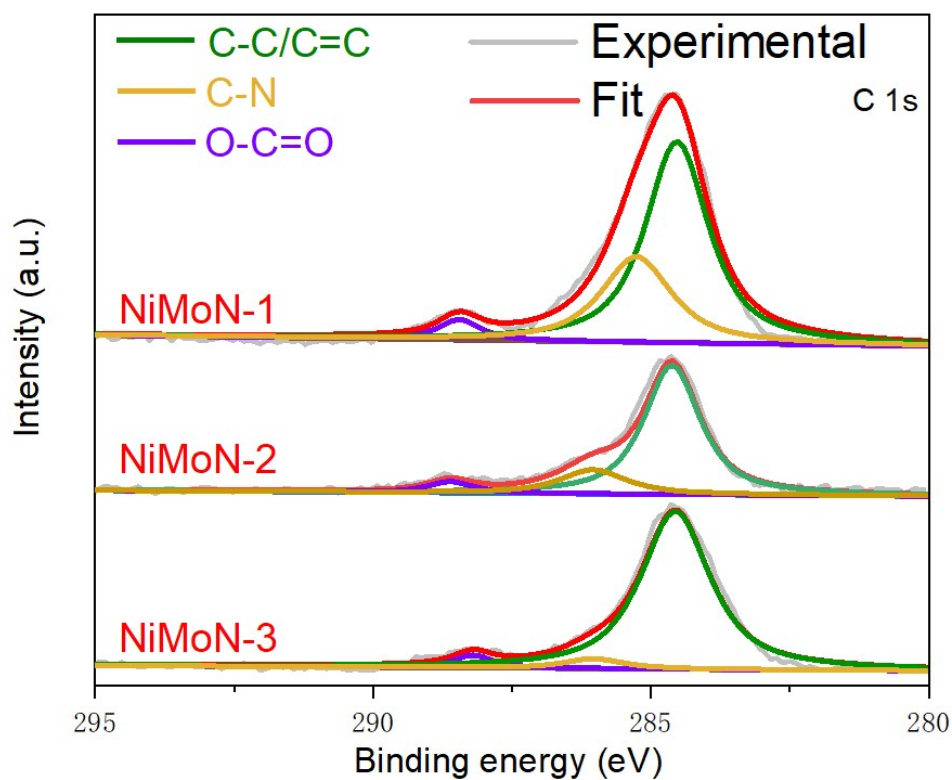

**Figure S4** High-resolution XPS spectra of C 1s.

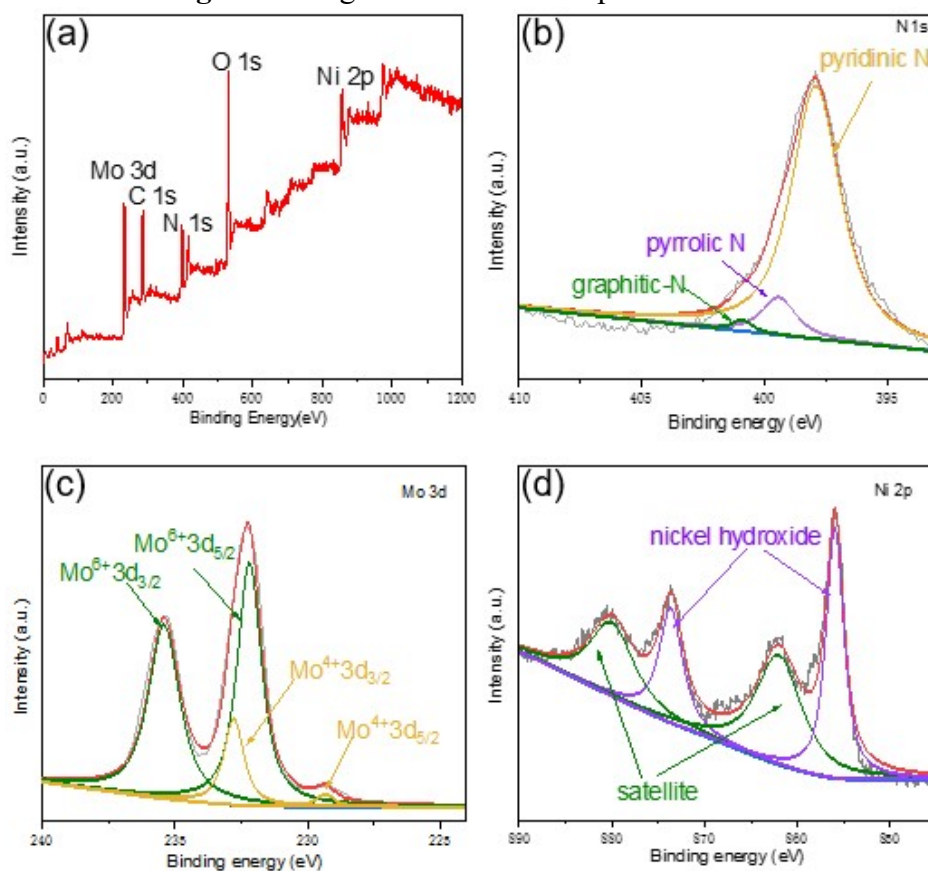

**Figure S5** XPS spectra of the bimetallic NiMoN-1 catalysts :  
(a) survey spectrum, (b) N 1s (c) Mo 3d, and (d) Ni 2p .

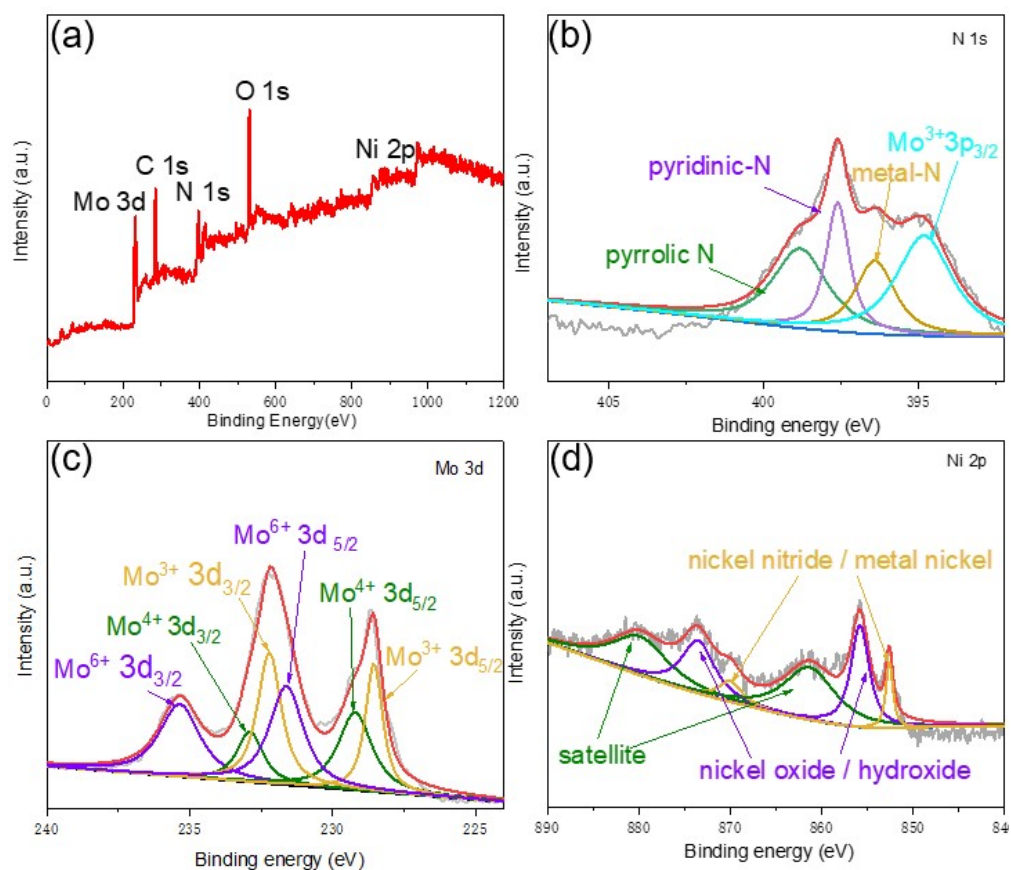

**Figure S6** XPS spectra of the bimetallic NiMoN-3 catalysts :  
(a) survey spectrum, (b) N 1s (c) Mo 3d, and (d) Ni 2p .

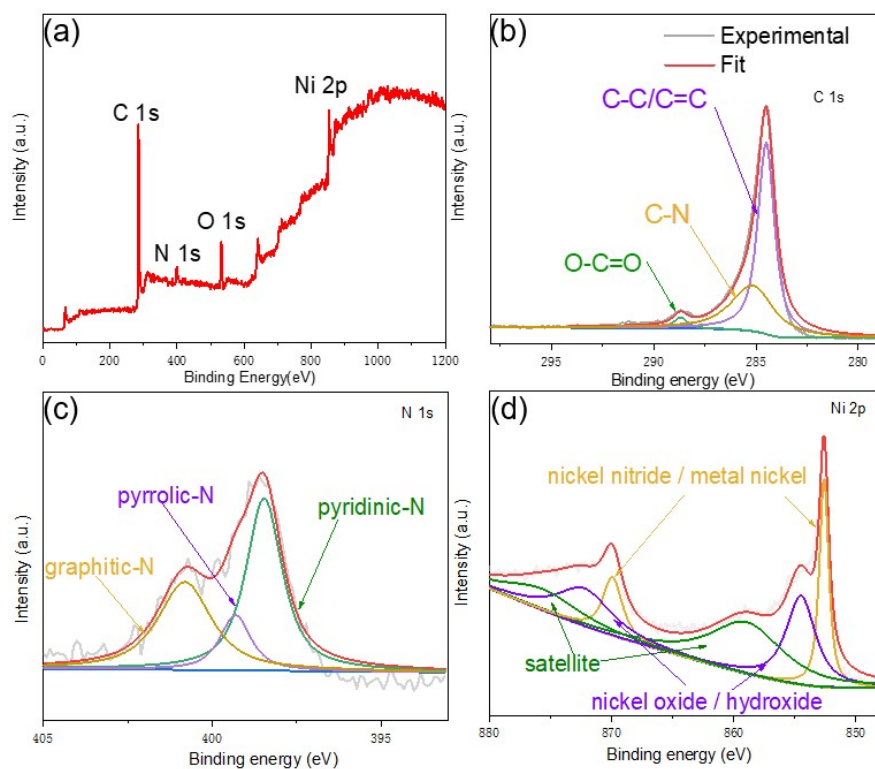

**Figure S7** XPS spectra of the bimetallic Ni-CN catalysts :  
(a) survey spectrum, (b) C 1s (c) N 1s, and (d) Ni 2p.

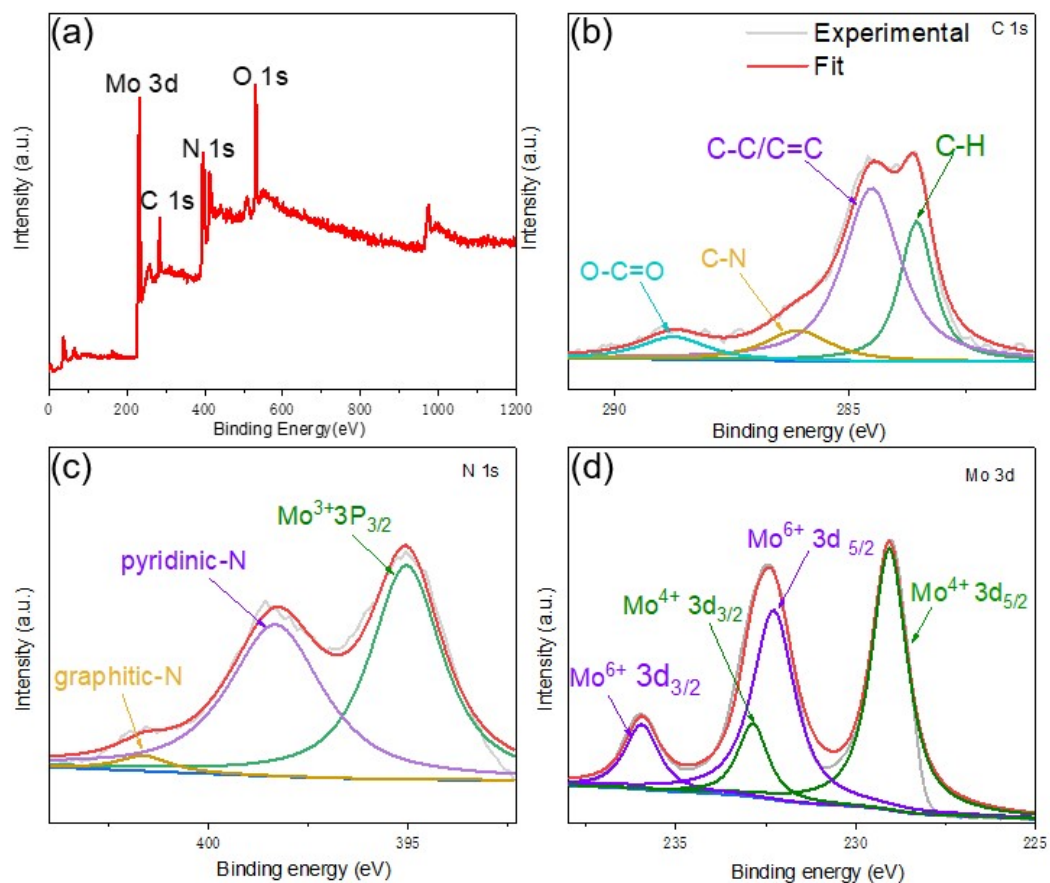

**Figure S8** XPS spectra of the bimetallic Mo-CN catalysts :  
(a) survey spectrum, (b) C 1s (c) N 1s, and (d) Mo 3d.

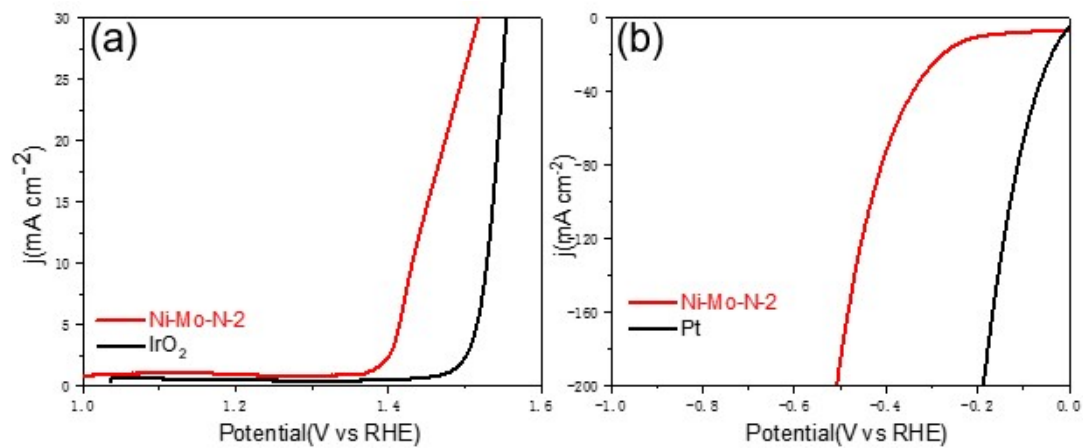

**Figure S9** Electrocatalytic activity in 1 M KOH (a) The polarization curves of OER,  
(a) The polarization curves of HER

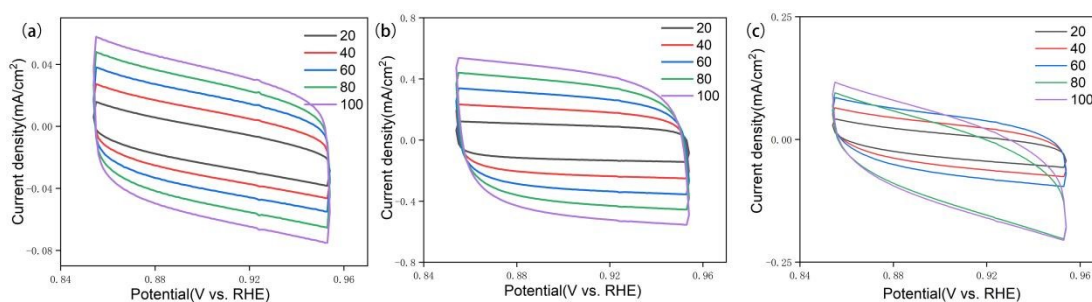

**Figure S10** Cyclic voltammograms with the scan rate from 20 to 100 mV/s for NiMoN-1, NiMoN-2, NiMoN-3 in 1 M KOH on electrocatalytic OER activity

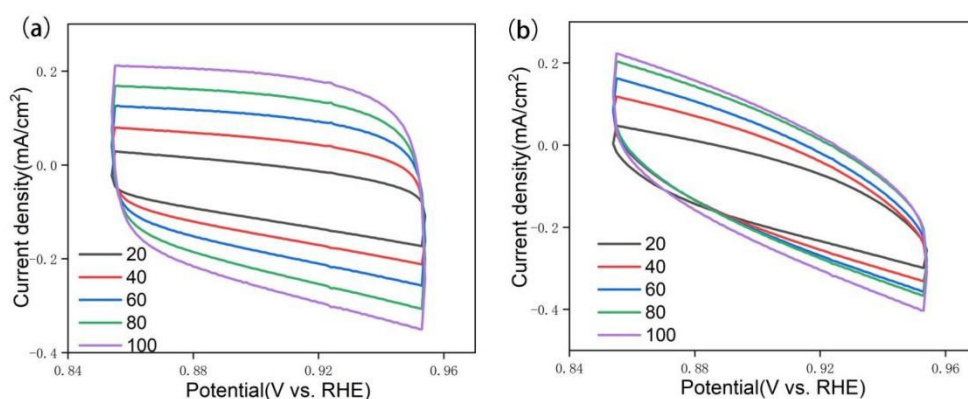

**Figure S11** Cyclic voltammograms with the scan rate from 20 to 100 mV/s for Ni-CN, Mo-CN in 1 M KOH on electrocatalytic OER activity

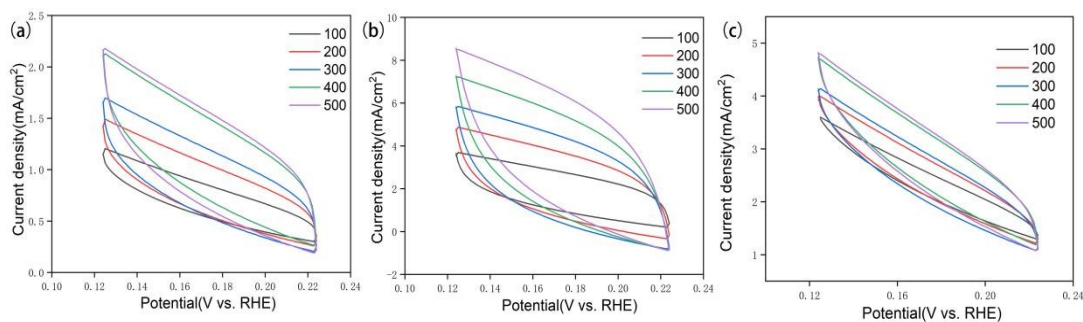

**Figure S12** Cyclic voltammograms with the scan rate from 20 to 100 mV/s for NiMoN-1, NiMoN-2, NiMoN-3 in 1 M KOH on electrocatalytic HER activity.

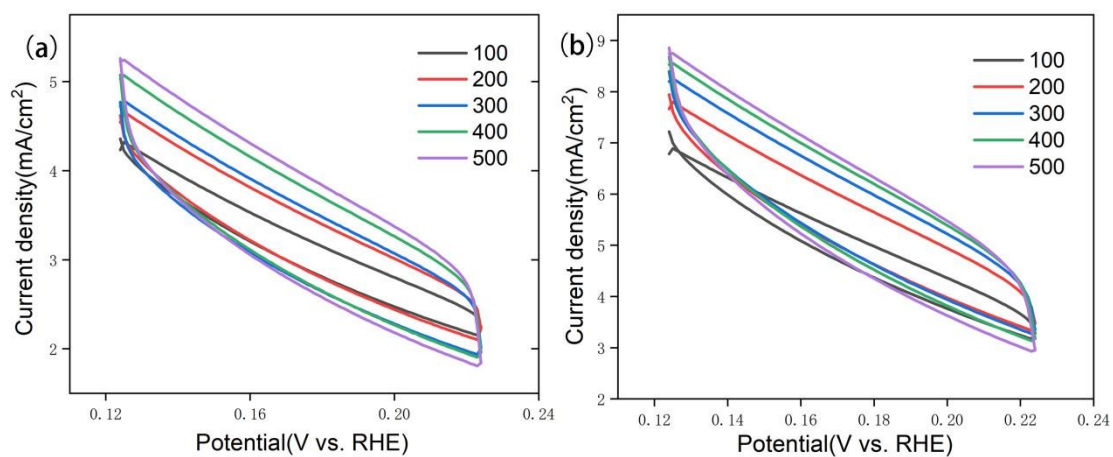

**Figure S13** Cyclic voltammograms with the scan rate from 20 to 100 mV/s for Ni-CN, Mo-CN in 1 M KOH on electrocatalytic HER activity.

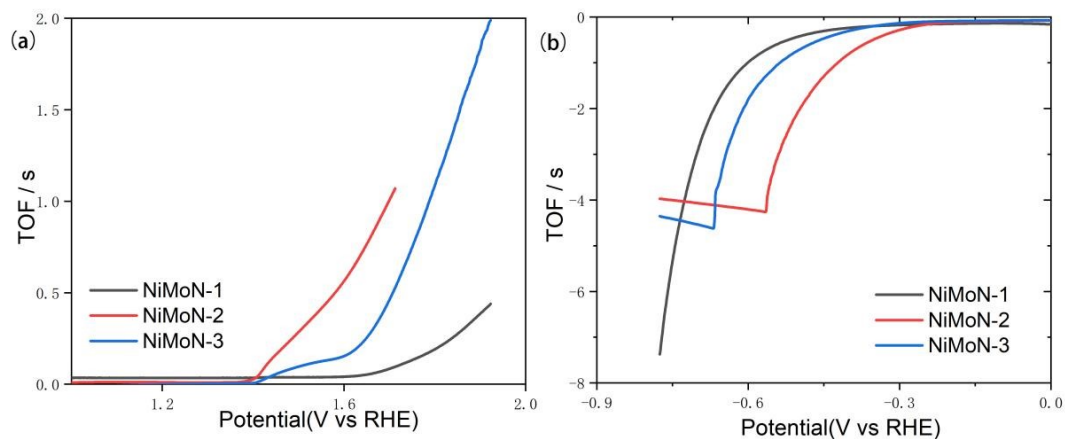

**Figure S14** (a) The OER-TOFs of the NiMoN-1, NiMoN-2, NiMoN-3 (b) The HER-TOFs of the NiMoN-1, NiMoN-2, NiMoN-3.

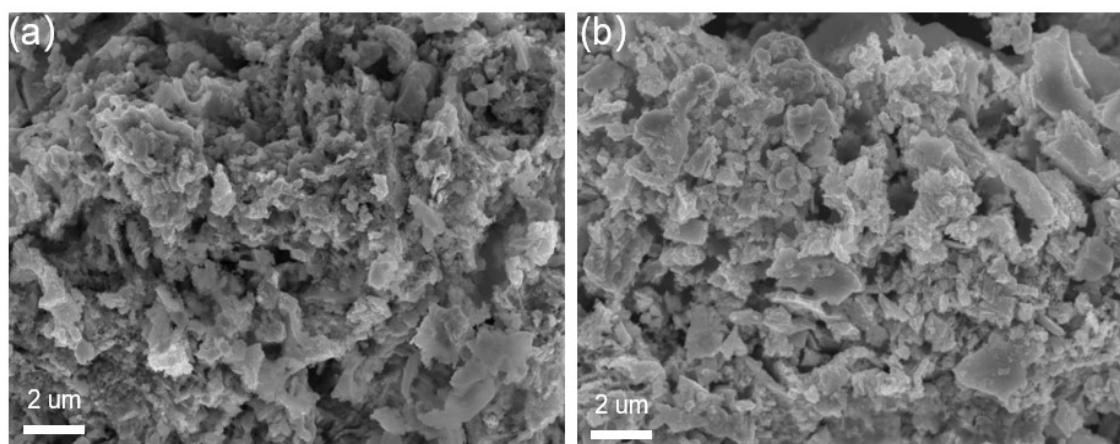

**Figure S15** SEM images of NiMoN-2 catalysts after (a) OER and (b) HER.

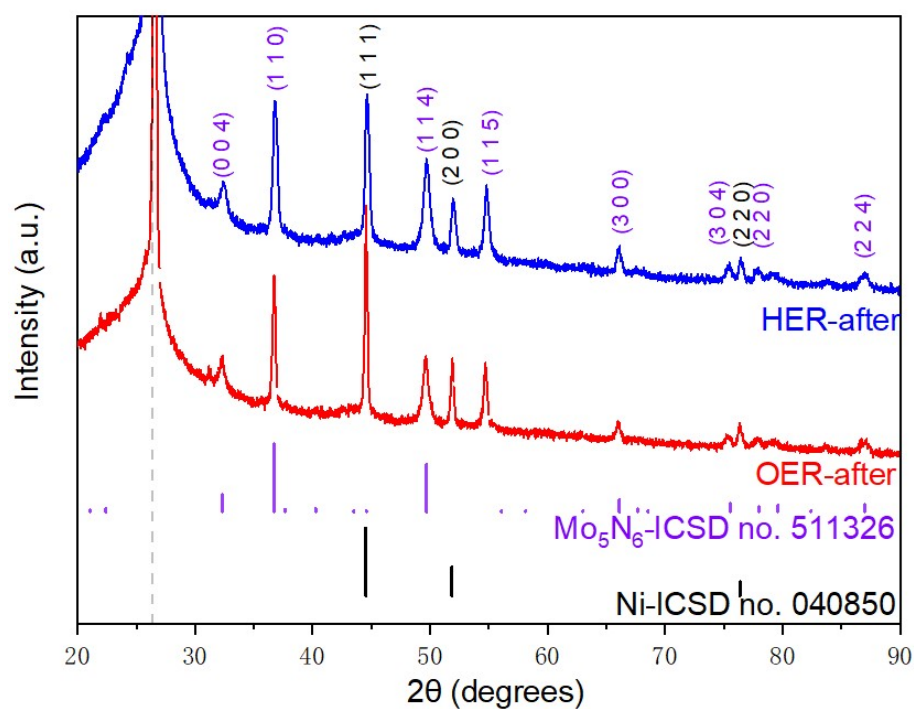

**Figure S16** XRD pattern of NiMoN-2 after OER and HER.

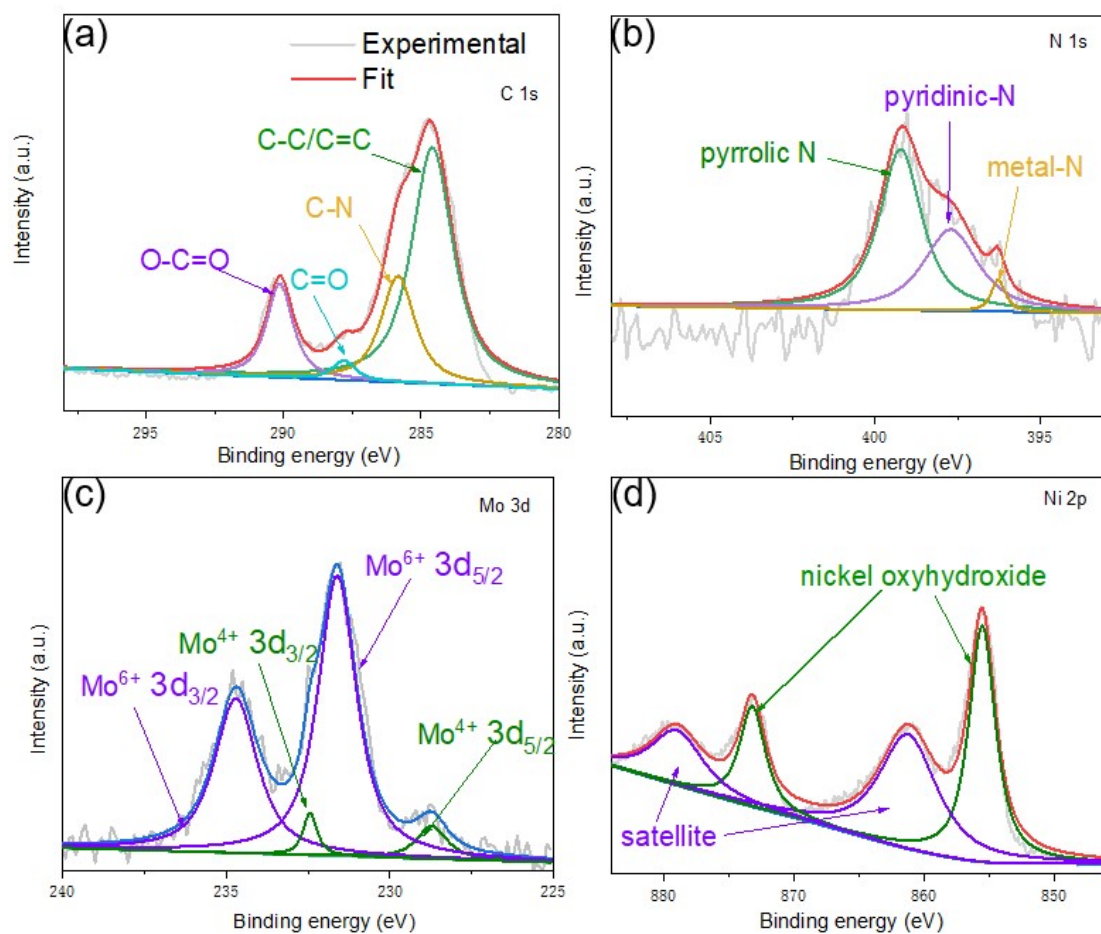

**Figure S17** XPS spectra of NiMoN-2 after OER.

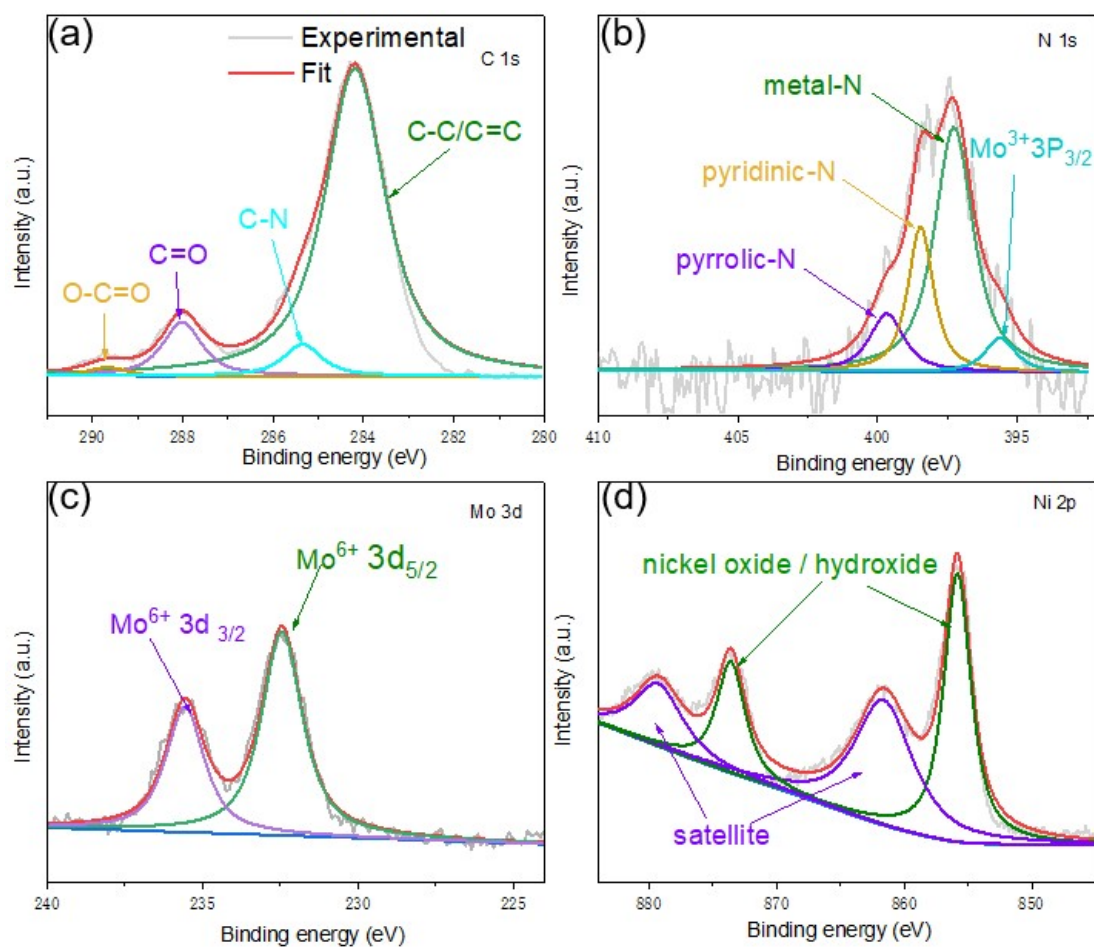

**Figure S18** XPS spectra of NiMoN-2 after HER.

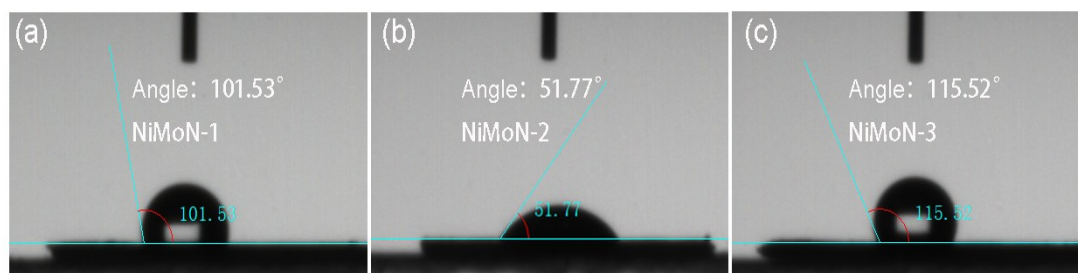

**Figure S19** Contact angles of (a) NiMoN-1, (b) NiMoN-2, and (c) NiMoN-3.

**Table S1.** Comparison of the  $R_{CT}$  values of the prepared materials .

| Sample  | $R_{CT}$ (Ohm)-OER | $R_{CT}$ (Ohm)-HER |
|---------|--------------------|--------------------|
| NiMoN-1 | 1.74               | 1.57               |
| NiMoN-2 | 1.51               | 1.42               |
| NiMoN-3 | 1.86               | 1.63               |
| Ni-CN   | 2.42               | 1.97               |
| Mo-CN   | 3.37               | 2.85               |

**Table S2.** Comparison of the catalytic activities of OER on NiMoN-2 with recently reported catalysts in the  $1.0 \text{ mol} \cdot \text{L}^{-1}$  KOH medium (pH = 14)

| Catalyst                                   | $\eta$ /mV vs. RHE | Ref.      |
|--------------------------------------------|--------------------|-----------|
| NiMoN-2                                    | 202                | This work |
| Co-NiMoN-400                               | 294                | [6]       |
| $\text{Ni}_{0.69}\text{Co}_{0.31}\text{P}$ | 266                | [17]      |
| Ni-Fe-MoN NTs                              | 228                | [18]      |
| $\text{Ni}_3\text{FeS}$                    | 223                | [19]      |
| NiMoN-550                                  | 295                | [20]      |
| NiMoC/NC-100                               | 328                | [25]      |
| CoNiMo-O/H <sub>2</sub> -450               | 279                | [27]      |
| NiMoNS                                     | 260                | [32]      |
| Ni-NiO/HGF-1.5h                            | 308                | [36]      |
| $\text{Ni}_3\text{FeN-NPs}$                | 280                | [43]      |
| $\text{Fe}^{3+}\text{NiCo}_2\text{O}_4$    | 210                | [44]      |
| Ni-BDC@NiFe-LDH-2                          | 272                | [46]      |
| $\text{Ni}_3\text{N/NiMoN-5}$              | 277                | [47]      |

Note:  $\eta$  is the overpotential measured at  $10 \text{ mA} \cdot \text{cm}^{-2}$ .

**Table S3.** Bifunctional electrocatalyst for overall water splitting in 1.0 M KOH solution.

| Catalyst                                | <i>Voltage</i> / V | Ref.      |
|-----------------------------------------|--------------------|-----------|
| NiMoN-2                                 | 1.58               | This work |
| b-NiMoO <sub>4</sub> /NF                | 1.55               | [2]       |
| Co-NiMoN-400                            | 1.57               | [6]       |
| Ni <sub>0.69</sub> Co <sub>0.31</sub> P | 1.59               | [17]      |
| Ni-Fe-MoN NTs                           | 1.513              | [18]      |
| NiMoN-550                               | 1.596              | [20]      |
| Ni <sub>3</sub> FeS                     | 1.57               | [19]      |
| NiMoC/NC-100                            | 1.72               | [25]      |
| CoNiMo-O/H <sub>2</sub> -450            | 1.59               | [27]      |
